# Supplementary material for: Strain-tunable magnetic and electronic properties of a CuCl3 monolayer
Source: Royal Society of Chemistry journal article supplement (doi:10.1039/d2cp01510b), 2022-01-01
Supplement: d2cp01510b1.pdf [file d2cp01510b1.pdf]

# Supplementary Material for Strain-tunable magnetic and electronic properties of $\text{CuCl}_3$ monolayer

Like Lin<sup>1</sup>, Hanlu Liu<sup>1</sup>, Yineng Huang<sup>2</sup>, Weiyu Long<sup>1</sup>, Jian Zhou<sup>1</sup>, Xue Yao<sup>3</sup>,  
Qing Jiang<sup>3</sup>, and Haiming Lu<sup>1,2,\*</sup>

*<sup>1</sup>College of Engineering and Applied Sciences, Jiangsu Key Laboratory of Artificial Functional Materials, Collaborative Innovation Center of Advanced Microstructures, Nanjing University, Nanjing 210093, P. R. China*

*<sup>2</sup>School of Physical Science and Technology, Xinjiang Laboratory of Phase Transitions and Microstructures of Condensed Matter Physics, Yili Normal University, Yining 835000, P. R. China*

*<sup>3</sup>Key Laboratory of Automobile Materials, Ministry of Education, School of Materials Science and Engineering, Jilin University, Changchun 130022, P. R. China*

*\* Correspondence: [haimlu@nju.edu.cn](mailto:haimlu@nju.edu.cn)(H.M.Lu)*

---

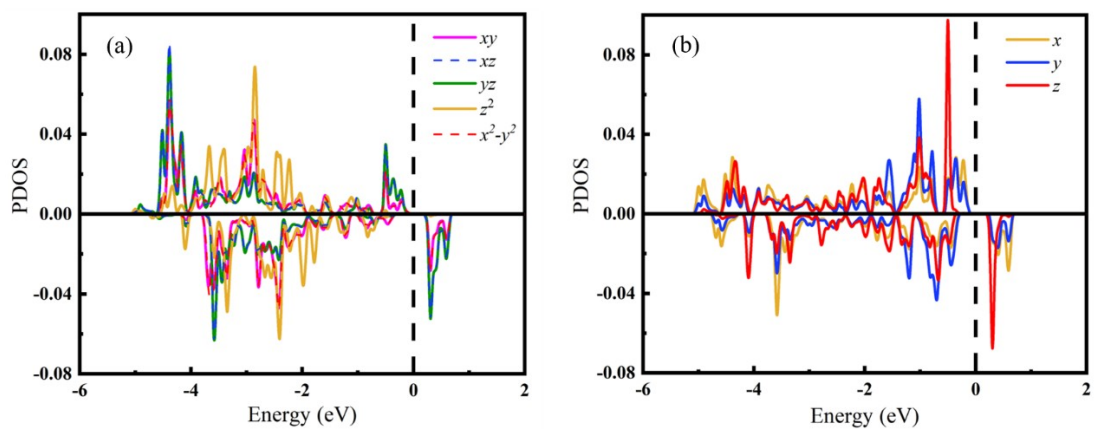

Fig. S1. (a) The *d* orbital PDOS of Cu atom and (b) the *p* orbital PDOS of Cl atom.

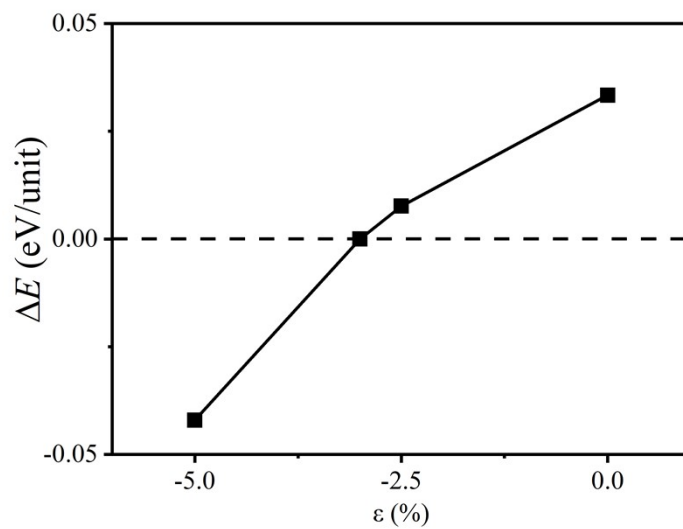

Fig. S2. Energy difference between FM and AFM  $\text{CuCl}_3$  monolayer as a function of the strain calculated by the LSDA.

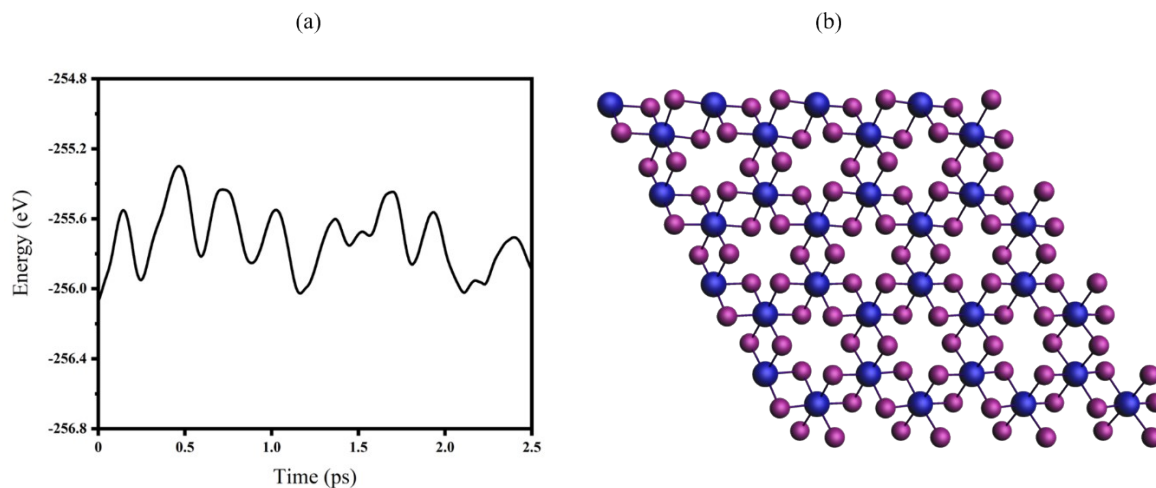

Fig. S3. (a) The potential energy fluctuation during the AIMD simulation at 300 K and (b) the top view of the atomic configuration of  $4 \times 4 \times 1$  CuCl<sub>3</sub> monolayer after 2.5 ps.
